# Supplementary material for: A Simple Method for On-Gel Detection of Myrosinase Activity
Source: MDPI journal article supplement (doi:10.3390/molecules23092204), 2018-08-31
Supplement: s1 [file s1]

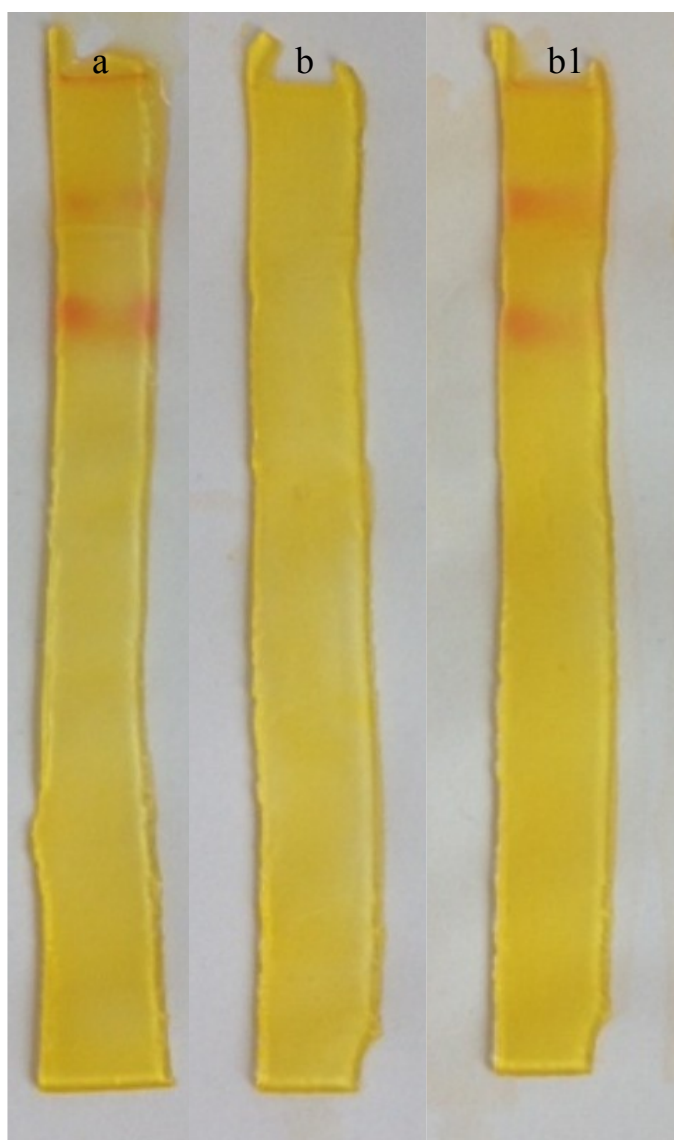

**Figure S1.** Selectivity of the proposed detection reaction. Myrosinase detection from 40  $\mu\text{l}$  of horseradish root crude extract (approximately 60  $\mu\text{g}$  protein) separated on 7.5% native polyacrilamide gel. After electrophoresis, gels were agitated in sterilized distilled water to wash out the electrolytes. Subplots:

- a: On-gel detection of myrosinase by the proposed detection reagent: positive reaction after 8 minutes.
- b: On-gel detection attempt of acid-releasing enzymes by the proposed detection reagent **without the myrosinase substrate sinigrin**: no reaction.
- b1: On-gel detection by the proposed detection reagent on band “b” after it failed to show any sinigrin-independent signal: positive reaction after 8 minutes.

Proposed detection reagent: sinigrin, 6 mM; ascorbic acid 1 mM;  $\text{Na}_2\text{HPO}_4$ , 1mM; pH 7.5; methyl red 100  $\mu\text{g mL}^{-1}$ .

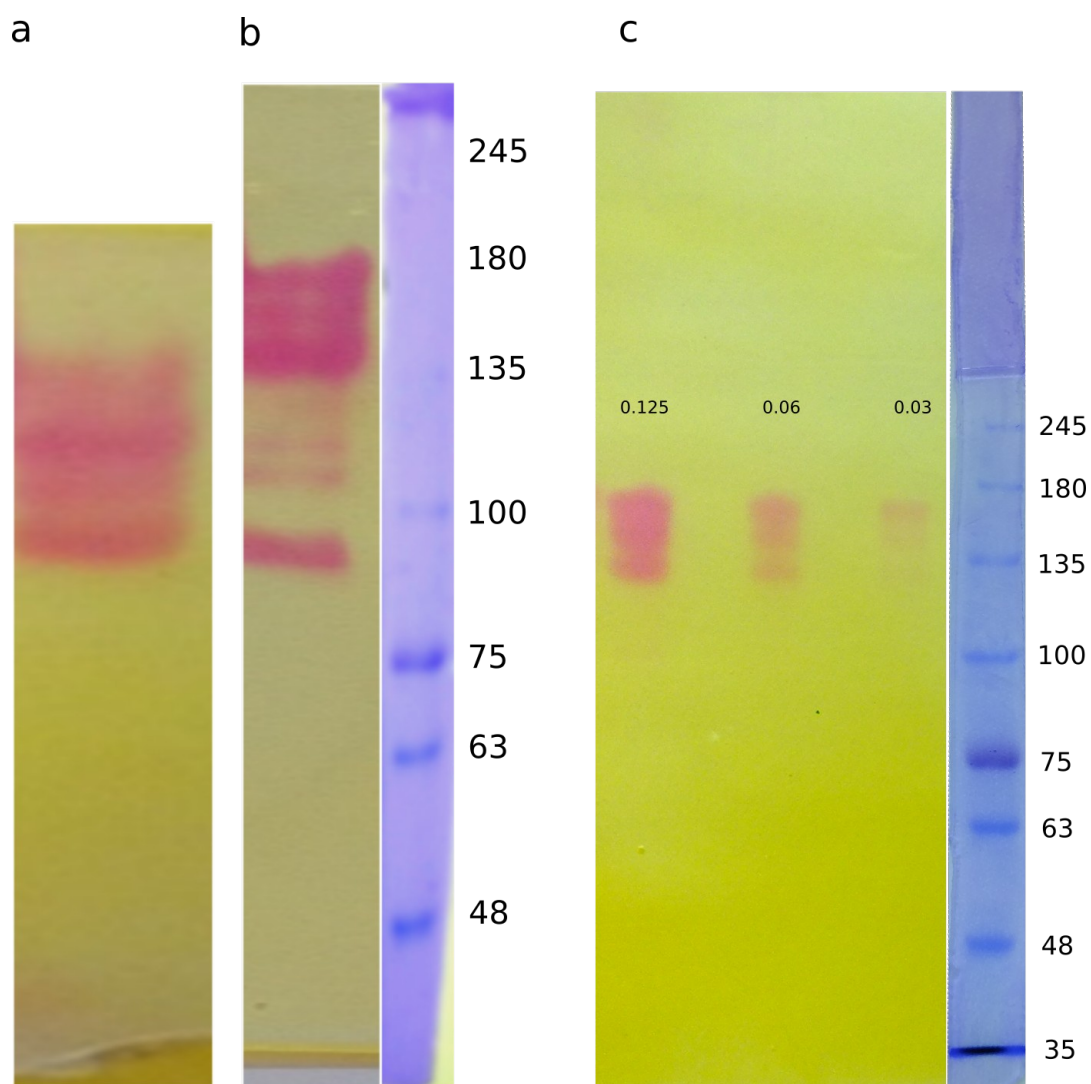

**Figure S2.** Myrosinases of *Sinapis alba*, separated and detected with the proposed procedure. High load is because of the high amount of storage proteins (subplots a, b). Subplots: a., Separation of crude extract of *S. alba* seeds (200 µg protein) on 7.5% native gel; b., Separation of crude extract of *S. alba* seeds (200 µg protein) on SDS-PAGE with 3% SDS in sample loading buffer. BLUeye Prestained Protein Ladder was used as the molecular marker. c., Myrosinase standard from *Sinapis alba* (Sigma Aldrich) separated on SDS-PAGE (0.125, 0.06 and 0.03 U, as indicated). BLUeye Prestained Protein Ladder was used as the molecular marker.

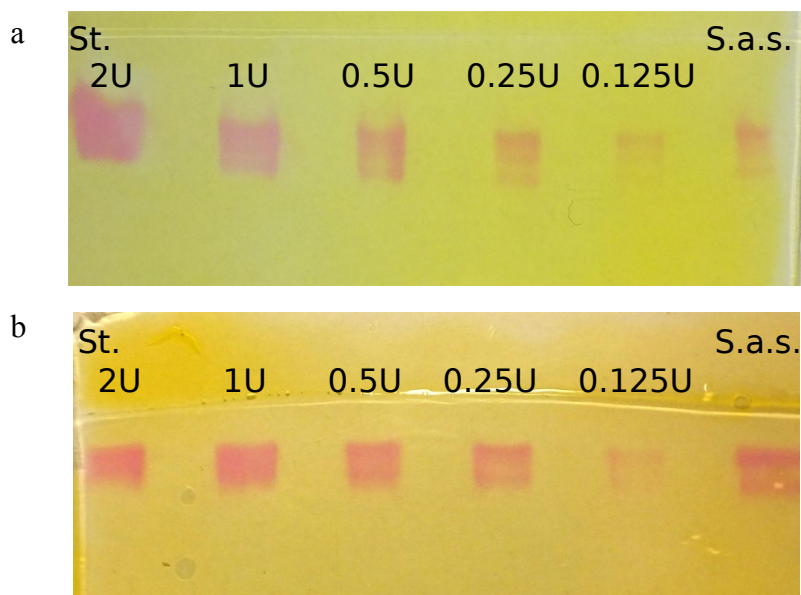

**Figure S3.** A serial dilution of purified *Sinapis alba* myrosinase and a crude extract of the same plant detected with the proposed reagent, after separation on a., native PAGE, b., 10% SDS-PAGE (after washout). Samples: St.: 0.125 - 2 U of *Sinapis alba* thioglucosidase (myrosinase) standard; S.a.s.: crude extract of 3-day-old *Sinapis alba* seedlings (80  $\mu$ g total protein content).

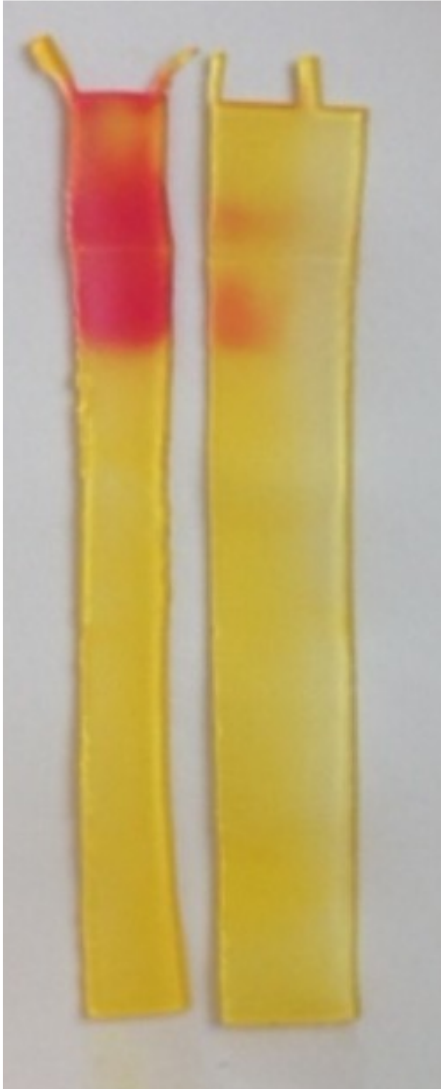

**Figure S4.**

Effect of pH during detection of myrosinases from *A. rusticana* (horseradish) samples separated on native PAGE gels and detected by the proposed reagent. Left: pH 6.4, right: pH 7.2.

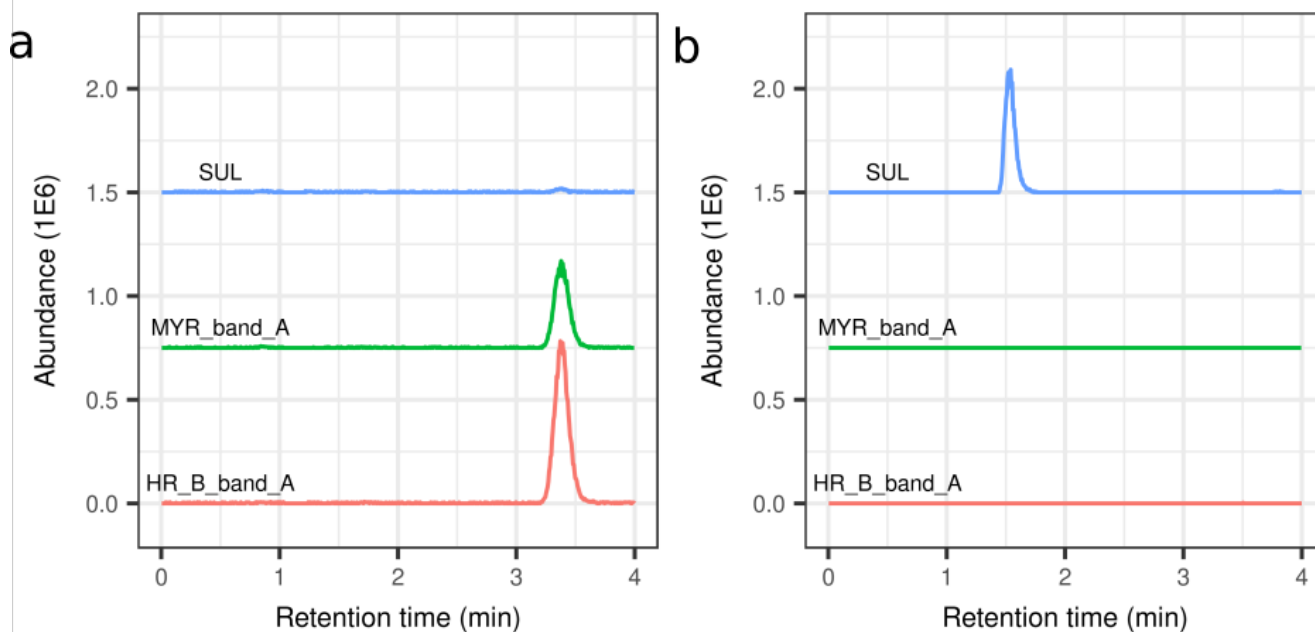

**Figure S5.** LC-ESI-MS chromatograms of cutout gel bands incubated with sinigrin in the presence of cysteamine for identification of sinigrin decomposition products and distinguishment of sulfatase activity from myrosinase activity. Subplots: a., Extracted ion chromatograms of  $m/z$  range of  $177.0515 \pm 5$  ppm, showing production of allyl isothiocyanate, detected in the form of cysteamine conjugate at retention time 3.2 min. b., Extracted ion chromatograms of  $m/z$  range of  $280.0849 \pm 5$  ppm, showing production of desulfo-sinigrin at retention time 1.55 min. All samples were separated on PAGE gels before the cutout of the band. Samples: MYR\_band\_A, a band from *Sinapis alba* thioglucosidase standard; HR\_B\_band\_A, a band from *Armoracia rusticana* (horseradish) crude extract; SUL, the band from sulfatase standard (*Helix pomatia*).

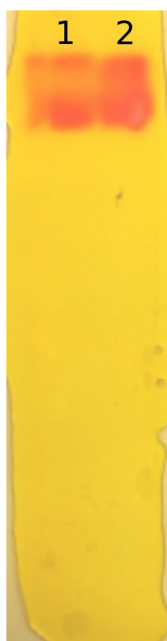

**Figure S6.**

Crude extracts of endophytic fungi containing myrosinase enzymes as detected with the proposed reagent, after separation on 10% SDS-PAGE and washout. Incubation time was 2 hours. Samples: 1: *Fusarium oxysporum*, endophyte from horseradish roots; 2: *Macrophomina phaseolina*, endophyte from horseradish roots.

**Table S1.**

Raw area under curve data and linearity data for Fig. 2. (on-gel detection of a serial dilution of *Sinapis alba* myrosinase on native gel) using the proposed detection procedure after image processing by CP Atlas 2.0 software.

| U ( $\mu\text{mol min}^{-1}$ ) \ Time | 4 min  | 6 min  | 8 min  | R <sup>2</sup> (Time) |
|---------------------------------------|--------|--------|--------|-----------------------|
| 0.25 U                                | 4878   | 9011   | 13498  | 0.9994                |
| 0.125 U                               | 2408   | 3741   | 5637   | 0.9900                |
| 0.0615 U                              | 1024   | 2168   | 3857   | 0.9878                |
| 0.031 U                               | 211    | 681    | 1361   | 0.9890                |
| R <sup>2</sup> (enzyme amount)        | 0.9976 | 0.9912 | 0.9828 |                       |

**Table S2.**

Raw area under curve data and linearity data for Fig. S2c. (on-gel detection of a serial dilution of *Sinapis alba* myrosinase on SDS-PAGE) using the proposed detection procedure after image processing by CP Atlas 2.0 software.

| U ( $\mu\text{mol min}^{-1}$ ) \ Time | 4 min  | 6 min  | 8 min  | R <sup>2</sup> (Time) |
|---------------------------------------|--------|--------|--------|-----------------------|
| 0.25 U                                | 3827   | 6155   | 11795  | 0.9455                |
| 0.125 U                               | 1947   | 3693   | 7544   | 0.9550                |
| 0.0615 U                              | 450    | 1236   | 2966   | 0.9552                |
| 0.031 U                               | 143    | 306    | 950    | 0.8941                |
| R <sup>2</sup> (enzyme amount)        | 0.9899 | 0.9741 | 0.9643 |                       |
